# Supplementary material for: A novel ultrasensitive surface plasmon resonance-based nanosensor for nitrite detection
Source: Royal Society of Chemistry journal article supplement (doi:10.1039/c9ra02460c), 2019-01-01
Supplement: c9ra02460c1.pdf [file c9ra02460c1.pdf]

## **A Novel Ultrasensitive Surface Plasmon Resonance- Based Nanosensor for Nitrite Detection**

Pandeng Miao<sup>a, b</sup>, Zhongdong Liu<sup>a\*</sup>, Jun Guo<sup>b</sup>, Ming Yuan<sup>b</sup>, Ruibo Zhong<sup>b</sup>, Liping Wang<sup>c\*</sup>,  
Feng Zhang<sup>b,c\*</sup>

<sup>a</sup> Grain College, Henan University of Technology, Zhengzhou 450001, P. R. China.

<sup>b</sup> State Key Laboratory of Respiratory Disease, Key Laboratory of Oral Medicine, Guangzhou Institute of Oral Disease, Stomatology Hospital; Department of Biomedical Engineering, School of Basic Medical Sciences, Guangzhou Medical University, Guangzhou 511436, China.

<sup>c</sup> School of Biomedical Engineering, Shanghai Jiaotong University, Shanghai 200241, P. R. China.

\* To whom correspondence should be addressed. Prof. Zhongdong Liu [liuzhongdong@aliyun.com](mailto:liuzhongdong@aliyun.com);

Prof. Liping Wang [lpingwang@sjtu.edu.cn](mailto:lpingwang@sjtu.edu.cn); Prof. Feng Zhang [fengzhang1978@hotmail.com](mailto:fengzhang1978@hotmail.com)

### ***Traditional method for detecting $\text{NO}_2^-$ (colorimetric method):***

The p-aminobenzenesulfonic acid undergoes diazotization reaction with  $\text{NO}_2^-$  or naphthylethylenediamine under acidic conditions to form dye molecules, and the color depth is positively correlated with the concentration of  $\text{NO}_2^-$ . In short, 0.2 mL, 4 g/L p-aminobenzenesulfonic acid solution was added to 4.7 mL 0-20  $\mu\text{g}$  / mL concentration gradient standard solution, mixed, and allowed to stand for 3 min, and then add 0.1 mL, 2 g/L naphthylethylenediamine hydrochloride solution, and mix and let stand for 10 min. The zero point was adjusted with a zero tube, and the absorbance was measured at a wavelength of 538 nm to draw a standard curve.

0.2 mL of 4 g/L p-aminobenzenesulfonic acid solution was added to 4.7 mL of sample solution, mixed and stand for 3 min, then add 0.1 mL, 2 g/L naphthylethylenediamine hydrochloride solution, mixed and stand for 10 min. The absorbance was measured at a wavelength of 538 nm, and the concentration of the  $\text{NO}_2^-$  of the sample liquid was obtained in combination with a standard curve.

The TEM image of NG-AuNPs was shown in Fig. S1A, we could see the NG-AuNPs was sphere morphology, and the diameter of NG-AuNPs was around 10 nm. When the NG-AuNPs reacted with ATP-AuNPs and nitrite to form color chromophore aggregates, a shell was formed outside the NG-AuNPs sphere (Fig. S1B), and the shell thickness was around 3-5 nm. The shell thickness was similar with the diameter of ATP-AuNPs. After coupling with ATP-AuNPs, we could observe the great aggregate of the AuNPs. And we speculated that the shell was formed by the ATP-AuNPs connected to NG-AuNPs via the diazotization coupling reaction in presence of nitrite.

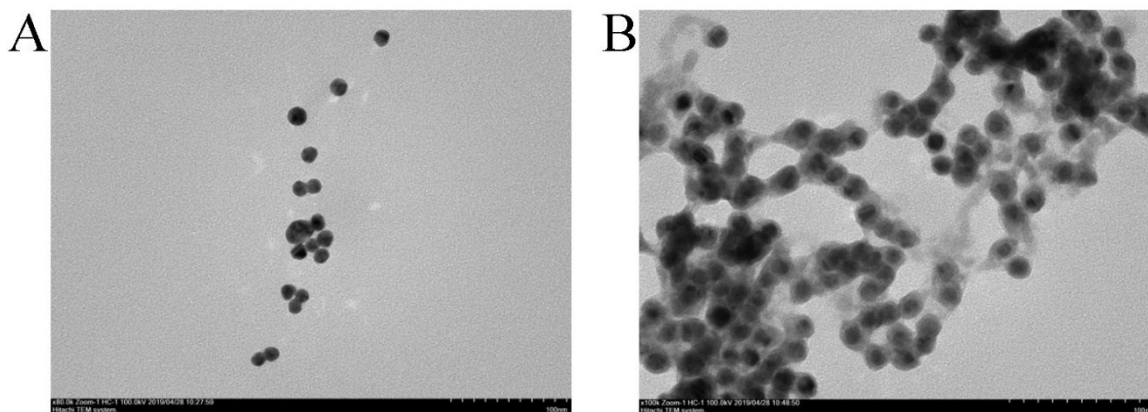

Fig. S1: TEM images of AuNPs. A. TEM image of NG-AuNPs; B. TEM image of gold aggregate formed by the ATP-AuNPs connected to NG-AuNPs in presence of nitrite.
